# Supplementary material
Source: Research Square preprint supplement (doi:10.21203/rs.3.rs-8914352/v1)
Supplement: Supplementary file 1 [file c3c2fb067a7cee607d161708.docx]

Table S1 Previous studies of Cs2PtI6 solar cell

| Device | Study Type | Jsc (mA/cm2) | Voc (V) | FF % | PCE% | Ref. |
| --- | --- | --- | --- | --- | --- | --- |
| FTO/CdS/Cs2PtI6/Spiro-OMeTAD /C | Experimental | 20.2 | 1.2 | 41 | 10.06 | [1] |
| FTO/WS2/Cs2PtI6/Cu2O/C | Numerical | 28.15 | 1.3 | 61 | 22.4 | [2] |
| FTO/TiO2/Cs2PtI6/Cu2O/Au | Numerical | 29.62 | 0.98 | 83.9 | 24.49 | [3] |
| FTO∕ZnO∕Cs2PtI6∕MoO3∕C | Numerical | 16.1 | 1.4 | 90 | 20.45 | [4] |
| FTO/SnO2/Cs2PtI6/MoO3/C | Numerical | 26.95 | 1.11 | 78 | 23.5 | [5] |
| FTO/SnS2/Cs2PtI6/MoTe2/Au | Numerical | 33.19 | 1.11 | 90 | 32.98 | [6] |
| FTO/ZnO/Cs2PtI6/CuInS2-QD/Au | Numerical | 32.9 | 1.2 | 82 | 32.7 | [7] |

Table S2 Material properties of FTO, CdS and Cs2PtI6

| Material | **FTO (500 nm)**  [8] | **Front IDL (5 nm)** | **CdS**[9] | **Cs2PtI6 (200- 800 nm)**  [1] |
| --- | --- | --- | --- | --- |
| Electron affinity (eV), χ | 4 | 4 | 4.2 | 4 |
| Relative permittivity, ɛ | 9 | 16.72 | 10 | 16.72 |
| Eg (eV) band gap | 3.5 | 1.4 | 2.4 | 1.4 |
| Electron mobility (cm2v-1s-1), µe | 20 | 310 | 100 | 310 |
| Hole mobility (cm2v-1s-1), µh | 10 | 62 | 25 | 62 |
| Donor density (cm-3), ND | 1X1018 | 0 | 1X1018 | 0 |
| Acceptor density (cm-3), NA | 0 | 1015 | - | 1015 |
| Effective conduction band density (cm-3), Nc | 2.2X1018 | 2.2X1018 | 2.2X1018 | 2.2X1018 |
| Effective valence band density (cm-3), Nv | 1.8X1019 | 1.8X1019 | 1.8X1019 | 1.8X1019 |
| Defect density (cm-3), Nt | 1X1015 | 2.5X1012 | 1X1019 | 2.5X1012 |


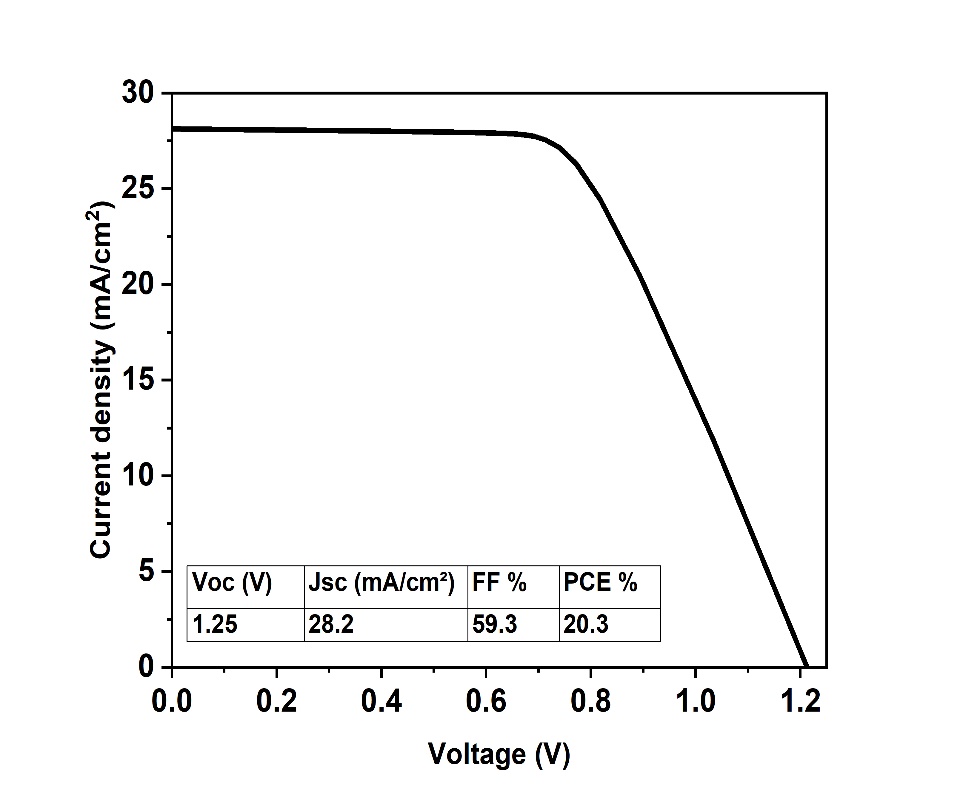

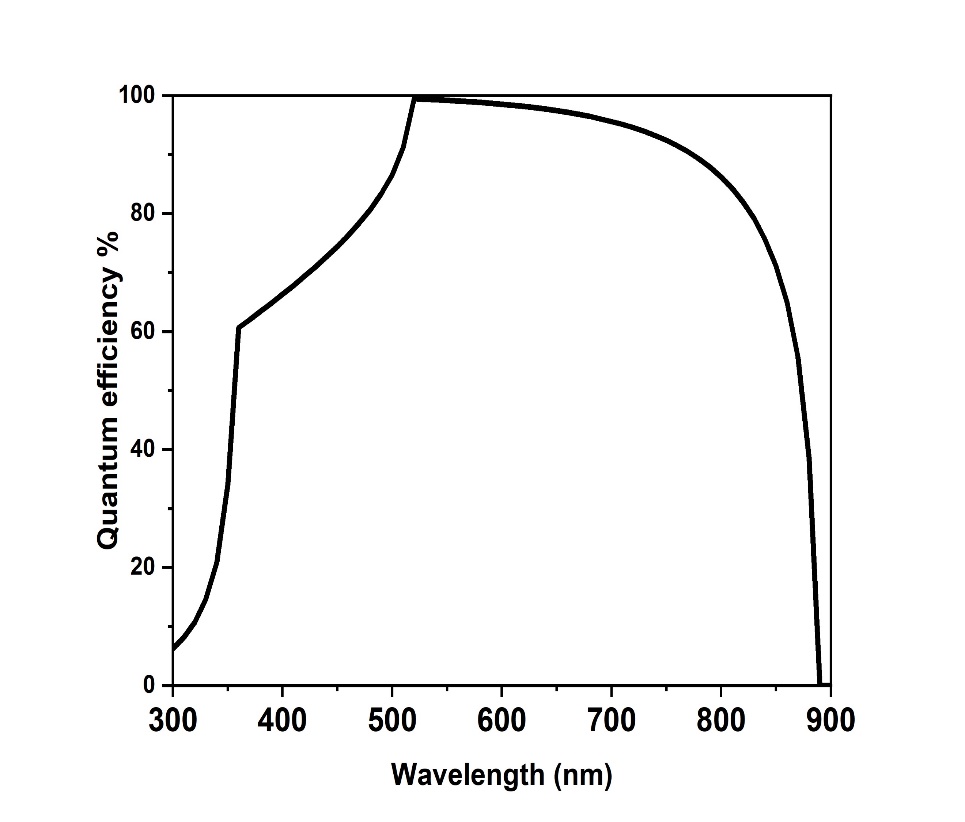


**(a)**

**(b)**

Figure S The numerical simulation of the optimized (FTO/CdS/Cs2PtI6/Pt) (a) J-V, (b) QE

# References

[1] D. Schwartz *et al.*, “Air Stable, High-Efficiency, Pt-Based Halide Perovskite Solar Cells with Long Carrier Lifetimes,” *Phys. Status Solidi - Rapid Res. Lett.*, vol. 14, no. 8, pp. 1–8, 2020, doi: 10.1002/pssr.202000182.

[2] H. H. AbdElAziz, M. Taha, W. M. A. El Rouby, M. H. Khedr, and L. Saad, “Evaluating the performance of Cs2PtI6−xBrx for photovoltaic and photocatalytic applications using first-principles study and SCAPS-1D simulation,” *Heliyon*, vol. 8, no. 10, p. e10808, 2022, doi: 10.1016/j.heliyon.2022.e10808.

[3] F. Sultana, F. Jannat, S. Ahmed, and M. A. Alim, “A comparative numerical approach between lead-free inorganic Cs2TiBr6 and Cs2PtI6-based perovskite solar cells,” *Results Opt.*, vol. 13, no. May, p. 100567, 2023, doi: 10.1016/j.rio.2023.100567.

[4] M. S. Shamna and K. S. Sudheer, “Device modeling of Cs2PtI6-based perovskite solar cell with diverse transport materials and contact metal electrodes: a comprehensive simulation study using solar cell capacitance simulator,” *J. Photonics Energy*, vol. 12, no. 3, 2022, doi: 10.1117/1.jpe.12.032211.

[5] A. Amjad, S. Qamar, C. Zhao, K. Fatima, M. Sultan, and Z. Akhter, “Numerical simulation of lead-free vacancy ordered Cs2PtI6 based perovskite solar cell using SCAPS-1D,” *RSC Adv.*, vol. 13, no. 33, pp. 23211–23222, 2023, doi: 10.1039/d3ra04176j.

[6] M. K. Hossain *et al.*, “An extensive study on charge transport layers to design and optimization of high-efficiency lead-free Cs2PtI6-based double-perovskite solar cells: A numerical simulation approach,” *Results Phys.*, vol. 61, no. December 2023, p. 107751, 2024, doi: 10.1016/j.rinp.2024.107751.

[7] M. Al Razy *et al.*, “Performance prediction of perovskite solar cell integrated with lead-free cesium platinum Iodide (Cs2PtI6) absorber and CuInS2 quantum Dot as HTL,” *Micro and Nanostructures*, vol. 185, no. November 2023, p. 207727, 2024, doi: 10.1016/j.micrna.2023.207727.

[8] S. Abdullahi *et al.*, “Optical Characterization of Fluorine doped Tin Oxide (FTO) thin films deposited by spray pyrolysis technique and annealed under Nitrogen atmosphere,” *Int. J. Innov. Appl. Stud.*, vol. 9, no. 2, pp. 947–955, 2014.

[9] L. I. Nykyruy, R. S. Yavorskyi, Z. R. Zapukhlyak, G. Wisz, and P. Potera, “Evaluation of CdS/CdTe thin film solar cells: SCAPS thickness simulation and analysis of optical properties,” *Opt. Mater. (Amst).*, vol. 92, no. December 2018, pp. 319–329, 2019, doi: 10.1016/j.optmat.2019.04.029.
